# Supplementary material for: An Amberlite IRA-400 Cl− ion-exchange resin modified with Prosopis juliflora seeds as an efficient Pb2+ adsorbent: adsorption, kinetics, thermodynamics, and computational modeling studies by density functional theory
Source: Royal Society of Chemistry journal article supplement (doi:10.1039/d0ra10128a), 2021-01-01
Supplement: d0ra10128a1.pdf [file d0ra10128a1.pdf]

**Amberlite IRA 400 Cl<sup>-</sup> ion exchange resin modified with Prosopis Juliflora seeds as an efficient Pb<sup>2+</sup> adsorbent: Adsorption, kinetics, thermodynamics, and computational modeling studies by density functional theory**

**Sivaprakasam Anbazhagan<sup>a\*</sup> Venugopal Thiruvengadam<sup>a\*</sup> and Anandhakumar Sukeri<sup>b</sup>**

<sup>a</sup> Department of Chemistry, Govt. College of Engineering, Salem- 636011, Tamilnadu, India.

<sup>b</sup> São Carlos Institute of Physics, University of São Paulo, Av. Trabalhador São-Carlense, 400 Parque Arnold Schmidt, PO Box 369, CEP-13566-590, São Carlos, São Paulo, Brazil.

\* Corresponding Authors: [greenchemistry2020@gmail.com](mailto:greenchemistry2020@gmail.com) & [venugopalt@gcesalem.edu.in](mailto:venugopalt@gcesalem.edu.in)

**Supplementary data**

**Table S1:** The FT-IR spectral characteristics of surface modified ion exchange resin before and after adsorption.

| FT-IR Peaks | Adsorption bands (cm <sup>-1</sup> ) |                  |             | Assignment        |
|-------------|--------------------------------------|------------------|-------------|-------------------|
|             | Before adsorption                    | After adsorption | Differences |                   |
| 1           | 3947.36                              | 3793.51          | 153.85      |                   |
| 2           | 3420.57                              | 3725.12          | -304.55     | Bonded –OH groups |
| 3           | 2928.57                              | -                | -           | C–H stretching    |
| 4           | 2368.57                              | 2346.58          | 21.99       |                   |
| 5           | 1599.67                              | 1600.97          | -1.3        | C = O group       |
| 6           | 1354.98                              | 1358.39          | -3.41       | S=O group         |
| 7           | 1190.34                              | 1213.80          | -85.03      | S=O group         |
| 8           | 1128.77                              | -                | -           | S=O group         |
| 9           | 1040.50                              | 1043.36          | -2.86       | C-X group         |
| 10          | 835.28                               | -                | -           | C-X group         |
| 11          | 776.85                               | 779.32           | -2.47       | C-X group         |
| 12          | 679.39                               | -                | -           | C-X group         |
| 13          | 621.20                               | -                | -           | -                 |
| 14          | 583.93                               | -                | -           | –C–C– group       |

**Table S2:** Parameters of the various isotherm models in adsorption of Pb<sup>2+</sup> onto SMA resin.

| Isotherms            | Parameters                      | Temperatures (K) |         |          |        |        |
|----------------------|---------------------------------|------------------|---------|----------|--------|--------|
|                      |                                 | 298              | 308     | 318      | 328    | 338    |
| Langmuir             | $K_L$ (L g <sup>-1</sup> )      | 0.12             | 0.18    | 0.141    | 0.115  | 0.041  |
|                      | $q_{max}$ (mg g <sup>-1</sup> ) | 106.5            | 66.36   | 64.79    | 63.75  | 105.7  |
|                      | $R^2$                           | 0.989            | 0.996   | 0.995    | 0.998  | 0.955  |
| Freundlich           | $K_F$ (mg g <sup>-1</sup> )     | 0.00184          | 0.00049 | 0.000584 | 0.0018 | 0.014  |
|                      | N                               | 0.447            | 0.359   | 0.354    | 0.389  | 0.51   |
|                      | $R^2$                           | 0.924            | 0.904   | 0.963    | 0.949  | 0.992  |
| Koble-Corrigan       | A                               | 22.82            | 16.39   | 15.29    | 13.23  | 874.8  |
|                      | B                               | 0.32             | 0.0334  | 0.113    | 0.143  | 35.96  |
|                      | N                               | -0.98            | -0.365  | -0.458   | -0.543 | -0.891 |
|                      | $R^2$                           | 0.956            | 0.974   | 0.997    | 0.999  | 0.021  |
| Dubinin-Radushkevich | E (kJ mol <sup>-1</sup> )       | 0.826            | 1.11    | 0.978    | 0.876  | 7.82   |
|                      | $q_s$ (mg g <sup>-1</sup> )     | 65.96            | 42.95   | 43.64    | 42.48  | 49.65  |
|                      | $R^2$                           | 0.873            | 0.751   | 0.816    | 0.799  | 0.777  |
| Temkin               | A (L g <sup>-1</sup> )          | 0.756            | 0.734   | 0.722    | 0.675  | 1.21   |
|                      | B (kJ mol <sup>-1</sup> )       | 12.32            | 11.23   | 10.43    | 8.45   | 29.32  |
|                      | $R^2$                           | 0.877            | 0.931   | 0.919    | 0.925  | 0.879  |

**Table S3:** The kinetic models of adsorption on Pb<sup>2+</sup> - loaded SMA resin at various temperatures

| Kinetic model          | Parameters                                               | Temperature (K) |        |       |       |       |
|------------------------|----------------------------------------------------------|-----------------|--------|-------|-------|-------|
|                        |                                                          | 298             | 308    | 318   | 328   | 338   |
| Pseudo first order     | K <sub>1</sub> (min <sup>-1</sup> )                      | 0.018           | 0.048  | 0.046 | 0.049 | 0.022 |
|                        | q <sub>e</sub> (mg g <sup>-1</sup> )                     | 26.28           | 29.96  | 24.68 | 25.13 | 38.55 |
|                        | R <sup>2</sup>                                           | 0.976           | 0.967  | 0.945 | 0.950 | 0.948 |
|                        | Δq <sub>e</sub> (%)                                      | 47.17           | 30.91  | 34.75 | 32.69 | 23.69 |
| Pseudo second order    | K <sub>2</sub> (mg g <sup>-1</sup> )                     | 0.228           | 0.070  | 0.235 | 0.293 | 0.144 |
|                        | q <sub>e</sub> (g mg <sup>-1</sup> min <sup>-1</sup> )   | 62.5            | 76.92  | 62.5  | 58.82 | 66.67 |
|                        | R <sup>2</sup>                                           | 0.999           | 0.997  | 0.999 | 0.999 | 0.996 |
|                        | Δq <sub>e</sub> (%)                                      | 10.95           | -16.05 | -3.07 | 1     | -4.43 |
| First order reaction   | K <sub>1</sub> (min <sup>-1</sup> )                      | 0.121           | 0.066  | 0.063 | 0.052 | 0.082 |
|                        | q <sub>e</sub> (mg g <sup>-1</sup> )                     | 49.99           | 50.68  | 49.76 | 49.75 | 49.57 |
|                        | R <sup>2</sup>                                           | 0.794           | 0.362  | 0.326 | 0.317 | 0.537 |
|                        | Δq <sub>e</sub> (%)                                      | 23.46           | 10.19  | 9.67  | 8.07  | 12.67 |
| Weber and Morris model | K <sub>id</sub> (mg g <sup>-1</sup> min <sup>1/2</sup> ) | 2.487           | 1.575  | 1.526 | 1.262 | 1.819 |
|                        | I                                                        | 39.28           | 43.13  | 42.39 | 43.66 | 41.26 |
|                        | R <sup>2</sup>                                           | 0.932           | 0.568  | 0.523 | 0.509 | 0.734 |

**Table S4:** The thermodynamic parameters for the adsorption of Pb<sup>2+</sup> onto SMA resin

| Temperature<br>(K) | Equilibrium constant<br>(K) | Thermodynamic parameters                  |                                           |                                                         |
|--------------------|-----------------------------|-------------------------------------------|-------------------------------------------|---------------------------------------------------------|
|                    |                             | $\Delta G^\circ$ (K J mol <sup>-1</sup> ) | $\Delta H^\circ$ (K J mol <sup>-1</sup> ) | $\Delta S^\circ$ (J mol <sup>-1</sup> K <sup>-1</sup> ) |
| 298                | 2.77                        | -2.52                                     | -10.13                                    | -24.45                                                  |
| 308                | 1.56                        | -1.13                                     |                                           |                                                         |
| 318                | 1.46                        | -1.01                                     |                                           |                                                         |
| 328                | 1.37                        | -0.86                                     |                                           |                                                         |
| 338                | 1.65                        | -1.4                                      |                                           |                                                         |

**Table S5:** The computational study for the adsorption of Pb<sup>2+</sup> on the SMA ion exchange resin

| Binding state                 | BE in K cal / mol<br>Pb <sup>2+</sup> ion in singlet<br>state | BE in K cal / mol<br>Pb <sup>2+</sup> ion in triplet<br>state | Bond distance<br>between hetero atom<br>and Pb <sup>2+</sup> ion in<br>singlet state (Å) | Bond distance<br>between hetero<br>atom and Pb <sup>2+</sup> ion<br>in triplet state (Å) |
|-------------------------------|---------------------------------------------------------------|---------------------------------------------------------------|------------------------------------------------------------------------------------------|------------------------------------------------------------------------------------------|
| Pyrene-CHO                    | 115.13179823                                                  | 328.74986146                                                  | 3.300000                                                                                 | 3.300000                                                                                 |
| Pyrene-OH                     | 112.036268229                                                 | 327.69215009                                                  | 3.30000                                                                                  | 3.300000                                                                                 |
| Pyrene-COOH<br>(chelate type) | 98.4458220152                                                 | 305.871852617                                                 | 3.261254 (-C=O)                                                                          | 3.261254                                                                                 |
|                               |                                                               |                                                               | 3.256463 (-O-H)                                                                          | 3.256463                                                                                 |
| Pyrene-CO                     | 153.573444695                                                 | 298.919717595                                                 | 3.3000                                                                                   | 3.300000                                                                                 |
| Pyrene-aromatic               | 129.90420271                                                  | 291.94962952                                                  | 5.452                                                                                    | 5.452                                                                                    |
| Pyrene SH                     | 92.234411885                                                  | 289.77034513                                                  | 3.825000                                                                                 | 3.825000                                                                                 |

**Table S6:** Maximum adsorption capacity calculated according to Langmuir isotherm for various adsorbent for the adsorption of  $Pb^{2+}$ .

| Adsorbents                   | $q_{max}$ (according to Langmuir)<br>(mg/g) | Reference  |
|------------------------------|---------------------------------------------|------------|
| Amberlite 400 Cl             | 32.491                                      | [21]       |
| Hazelnut husk AC             | 13.05                                       | [33]       |
| Tamarind wood AC             | 43.859                                      | [34]       |
| cellulose modified bone char | 89.9                                        | [35]       |
| Palm Oil mill effluent AC    | 94.34                                       | [36]       |
| polyaniline coated PJ seed   | 90.91                                       | [37]       |
| ARASA                        | 270.2                                       | [38]       |
| modified Alojji clay         | 142.57                                      | [39]       |
| sludge based bio-char        | 16.70 and 49.47                             | [40]       |
| SMA resin                    | 106.5                                       | This Study |
